# Supplementary material for: Comparative Analysis of Qualitative and Bioactive Compounds of Whole and Refined Flours in Durum Wheat Grains with Different Year of Release and Yield Potential
Source: MDPI journal article supplement (doi:10.3390/plants12061350), 2023-03-17
Supplement: s1 [file s1]

Supplementary materials.

**Table S1.**

Free Soluble phenolic, Soluble Conjugated, Insoluble Bound acids in wholemeal.

a) Free Soluble phenolic acids ( $\mu\text{g g}^{-1}$ ) in wholemeal

| Genotype      | Gallic acid       | <i>p</i> -Hydroxybenzoic Acid | Vanillic acid | Caffeic acid | Syringic acid | Vanillin          | Ferulic acid | Sinapic acid | <i>p</i> -coumaric acid | Trans-cinnamic acid | TPAs              | Vitexin            |
|---------------|-------------------|-------------------------------|---------------|--------------|---------------|-------------------|--------------|--------------|-------------------------|---------------------|-------------------|--------------------|
| Cappelli      | 4.55 <sup>a</sup> | n.d.                          | n.d.          | n.d.         | n.d.          | 3.12 <sup>d</sup> | n.d.         | n.d.         | n.d.                    | n.d.                | 7.67 <sup>b</sup> | 17.52 <sup>e</sup> |
| Sfinge        | 4.32 <sup>c</sup> | n.d.                          | n.d.          | n.d.         | n.d.          | 1.44 <sup>e</sup> | n.d.         | n.d.         | n.d.                    | n.d.                | 5.76 <sup>e</sup> | 73.36 <sup>b</sup> |
| Marco Aurelio | 4.08 <sup>b</sup> | n.d.                          | n.d.          | n.d.         | n.d.          | 3.36 <sup>c</sup> | n.d.         | n.d.         | n.d.                    | n.d.                | 7.44 <sup>c</sup> | 75.04 <sup>a</sup> |
| Nadif         | 4.4 <sup>b</sup>  | n.d.                          | n.d.          | n.d.         | n.d.          | 4.0 <sup>b</sup>  | n.d.         | n.d.         | n.d.                    | n.d.                | 8.40 <sup>a</sup> | 65.2 <sup>c</sup>  |
| Kronos        | 2.72 <sup>d</sup> | n.d.                          | n.d.          | n.d.         | n.d.          | 4.32 <sup>a</sup> | n.d.         | n.d.         | n.d.                    | n.d.                | 7.04 <sup>d</sup> | 54.88 <sup>d</sup> |

b) Soluble Conjugated phenolic acids ( $\mu\text{g g}^{-1}$ ) in wholemeal

| Genotype      | Gallic acid | <i>p</i> -Hydroxybenzoic Acid | Vanillic acid     | Caffeic acid | Syringic acid     | Vanillin          | Ferulic acid       | Sinapic acid        | <i>p</i> -coumaric acid | Trans-cinnamic acid | TPAs               | Vitexin |
|---------------|-------------|-------------------------------|-------------------|--------------|-------------------|-------------------|--------------------|---------------------|-------------------------|---------------------|--------------------|---------|
| Cappelli      | n.d.        | 1.455 <sup>d</sup>            | 6.95 <sup>d</sup> | n.d.         | 1.45 <sup>d</sup> | 0.70 <sup>d</sup> | 6.345 <sup>e</sup> | 2.55 <sup>e</sup>   | n.d.                    | 4.25 <sup>c</sup>   | 23.71 <sup>e</sup> | n.d.    |
| Sfinge        | n.d.        | 2.345 <sup>a</sup>            | 8.75 <sup>a</sup> | n.d.         | 2.30 <sup>b</sup> | 1.10 <sup>a</sup> | 12.40 <sup>a</sup> | 6.15 <sup>c</sup>   | n.d.                    | 3.60 <sup>d</sup>   | 36.65 <sup>a</sup> | n.d.    |
| Marco Aurelio | n.d.        | 2.25 <sup>b</sup>             | 8.05 <sup>b</sup> | n.d.         | 2.40 <sup>a</sup> | 0.90 <sup>b</sup> | 10.10 <sup>b</sup> | 10.245 <sup>a</sup> | n.d.                    | 2.02 <sup>e</sup>   | 35.97 <sup>b</sup> | n.d.    |
| Nadif         | n.d.        | 2.045 <sup>c</sup>            | 7.50 <sup>c</sup> | n.d.         | 1.65 <sup>c</sup> | 0.75 <sup>d</sup> | 6.80 <sup>d</sup>  | 2.90 <sup>d</sup>   | n.d.                    | 5.165 <sup>b</sup>  | 26.81 <sup>d</sup> | n.d.    |
| Kronos        | n.d.        | 2.25 <sup>b</sup>             | 7.00 <sup>d</sup> | n.d.         | 2.45 <sup>a</sup> | 0.80 <sup>c</sup> | 7.145 <sup>c</sup> | 7.10 <sup>b</sup>   | n.d.                    | 5.85 <sup>a</sup>   | 32.60 <sup>c</sup> | n.d.    |

c) Insoluble Bound phenolic acids ( $\mu\text{g g}^{-1}$ ) in wholemeal

| Genotype      | Gallic acid | <i>p</i> -Hydroxybenzoic Acid | Vanillic acid     | Caffeic acid      | Syringic acid      | Vanillin          | Ferulic acid         | Sinapic acid        | <i>p</i> -coumaric acid | Trans-cinnamic acid | TPAs                | Vitexin |
|---------------|-------------|-------------------------------|-------------------|-------------------|--------------------|-------------------|----------------------|---------------------|-------------------------|---------------------|---------------------|---------|
| Cappelli      | n.d.        | 1.95 <sup>d</sup>             | 7.92 <sup>a</sup> | 0.80 <sup>d</sup> | 2.48 <sup>b</sup>  | 3.01 <sup>b</sup> | 480.365 <sup>a</sup> | 12.045 <sup>b</sup> | 15.085 <sup>c</sup>     | n.d.                | 523.65 <sup>a</sup> | n.d.    |
| Sfinge        | n.d.        | 2.10 <sup>c</sup>             | 6.10 <sup>c</sup> | 1.18 <sup>b</sup> | 2.63 <sup>a</sup>  | 2.93 <sup>b</sup> | 450.58 <sup>c</sup>  | 12.93 <sup>b</sup>  | 17.20 <sup>a</sup>      | n.d.                | 495.65 <sup>c</sup> | n.d.    |
| Marco Aurelio | n.d.        | 2.68 <sup>b</sup>             | 7.18 <sup>b</sup> | 1.04 <sup>c</sup> | 2.13 <sup>d</sup>  | 3.22 <sup>a</sup> | 469.46 <sup>b</sup>  | 10.12 <sup>c</sup>  | 15.29 <sup>b</sup>      | n.d.                | 511.12 <sup>b</sup> | n.d.    |
| Nadif         | n.d.        | 2.90 <sup>a</sup>             | 5.53 <sup>e</sup> | 0.57 <sup>e</sup> | 2.24 <sup>c</sup>  | 2.51 <sup>d</sup> | 421.23 <sup>d</sup>  | 7.11 <sup>d</sup>   | 11.31 <sup>d</sup>      | n.d.                | 453.40 <sup>d</sup> | n.d.    |
| Kronos        | n.d.        | 1.55 <sup>e</sup>             | 5.78 <sup>d</sup> | 1.37 <sup>a</sup> | 2.22 <sup>cd</sup> | 2.64 <sup>c</sup> | 369.87 <sup>e</sup>  | 7.18 <sup>d</sup>   | 9.23 <sup>e</sup>       | n.d.                | 399.84 <sup>e</sup> | n.d.    |

Results are expressed as  $\mu\text{g g}^{-1}$  of flour on a dry sample weight basis. Data are represented as mean  $\pm$  standard deviation of three replicate extractions. The same letter indicates no statistical difference, whereas different letters stand for significant statistical difference ( $P < 0.05$ ; Tukey's test).

**Table S2.**

Free Soluble phenolic, Soluble Conjugated, Insoluble Bound acids in semolina

a) Free Soluble phenolic acids ( $\mu\text{g g}^{-1}$ ) in semolina

| Genotype      | Gallic acid        | <i>p</i> -Hydroxybenzoic Acid | Vanillic acid     | Caffeic acid | Syringic acid | Vanillin | Ferulic acid | Sinapic acid | <i>p</i> -coumaric acid | Trans-cinnamic acid | TPAs              | Vitexin            |
|---------------|--------------------|-------------------------------|-------------------|--------------|---------------|----------|--------------|--------------|-------------------------|---------------------|-------------------|--------------------|
| Cappelli      | 1.36 <sup>b</sup>  | n.d.                          | 1.52 <sup>a</sup> | n.d.         | n.d.          | n.d.     | n.d.         | n.d.         | n.d.                    | n.d.                | 2.88 <sup>b</sup> | 12.08 <sup>a</sup> |
| Sfinge        | 0.8 <sup>d</sup>   | n.d.                          | 1.12 <sup>c</sup> | n.d.         | n.d.          | n.d.     | n.d.         | n.d.         | n.d.                    | n.d.                | 1.92 <sup>b</sup> | n.d.               |
| Marco Aurelio | 3.2 <sup>a</sup>   | n.d.                          | 1.36 <sup>b</sup> | n.d.         | n.d.          | n.d.     | n.d.         | n.d.         | n.d.                    | n.d.                | 4.56 <sup>a</sup> | 8 <sup>c</sup>     |
| Nadif         | 0.88 <sup>e</sup>  | n.d.                          | 1.36 <sup>b</sup> | n.d.         | n.d.          | n.d.     | n.d.         | n.d.         | n.d.                    | n.d.                | 2.24 <sup>c</sup> | n.d.               |
| Kronos        | 1.205 <sup>c</sup> | n.d.                          | 1.04 <sup>c</sup> | n.d.         | n.d.          | n.d.     | n.d.         | n.d.         | n.d.                    | n.d.                | 2.25 <sup>c</sup> | 10.4 <sup>b</sup>  |

b) Soluble Conjugated phenolic acids ( $\mu\text{g g}^{-1}$ ) in semolina

| Genotype      | Gallic acid | <i>p</i> -Hydroxybenzoic Acid | Vanillic acid      | Caffeic acid | Syringic acid | Vanillin           | Ferulic acid       | Sinapic acid       | <i>p</i> -coumaric acid | Trans-cinnamic acid | TPAs               | Vitexin |
|---------------|-------------|-------------------------------|--------------------|--------------|---------------|--------------------|--------------------|--------------------|-------------------------|---------------------|--------------------|---------|
| Cappelli      | n.d.        | 0.555 <sup>c</sup>            | 1.325 <sup>c</sup> | n.d.         | n.d.          | 0.405 <sup>c</sup> | 1.365 <sup>e</sup> | 2.38 <sup>c</sup>  | n.d.                    | n.d.                | 6.03 <sup>c</sup>  | n.d.    |
| Sfinge        | n.d.        | 1.01 <sup>b</sup>             | 2.03 <sup>b</sup>  | n.d.         | n.d.          | 0.09 <sup>e</sup>  | 2.285 <sup>c</sup> | 2.99 <sup>b</sup>  | n.d.                    | n.d.                | 8.41 <sup>b</sup>  | n.d.    |
| Marco Aurelio | n.d.        | 0.99 <sup>b</sup>             | 2.045 <sup>b</sup> | n.d.         | n.d.          | 0.77 <sup>a</sup>  | 2.42 <sup>b</sup>  | 2.225 <sup>d</sup> | n.d.                    | n.d.                | 8.45 <sup>b</sup>  | n.d.    |
| Nadif         | n.d.        | 0.445 <sup>d</sup>            | 1.25 <sup>c</sup>  | n.d.         | n.d.          | 0.32 <sup>d</sup>  | 2.045 <sup>d</sup> | 2.4 <sup>c</sup>   | n.d.                    | n.d.                | 6.46 <sup>c</sup>  | n.d.    |
| Kronos        | n.d.        | 1.36 <sup>a</sup>             | 2.92 <sup>a</sup>  | n.d.         | n.d.          | 0.61 <sup>b</sup>  | 3.045 <sup>a</sup> | 4.41 <sup>a</sup>  | n.d.                    | n.d.                | 12.35 <sup>a</sup> | n.d.    |

c) Insoluble Bound phenolic acids ( $\mu\text{g g}^{-1}$ ) in semolina

| Genotype      | Gallic acid | <i>p</i> -Hydroxybenzoic Acid | Vanillic acid      | Caffeic acid | Syringic acid      | Vanillin           | Ferulic acid        | Sinapic acid       | <i>p</i> -coumaric acid | Trans-cinnamic acid | TPAs               | Vitexin |
|---------------|-------------|-------------------------------|--------------------|--------------|--------------------|--------------------|---------------------|--------------------|-------------------------|---------------------|--------------------|---------|
| Cappelli      | n.d.        | 0.62 <sup>a</sup>             | 0.66 <sup>c</sup>  | n.d.         | 0.32 <sup>b</sup>  | 1.87 <sup>b</sup>  | 63.7 <sup>a</sup>   | 1.14 <sup>c</sup>  | 1.675 <sup>c</sup>      | n.d.                | 69.99 <sup>a</sup> | n.d.    |
| Sfinge        | n.d.        | 0.35 <sup>c</sup>             | 0.395 <sup>e</sup> | n.d.         | 0.24 <sup>d</sup>  | 1.91 <sup>ab</sup> | 55.44 <sup>d</sup>  | 1.335 <sup>b</sup> | 1.41 <sup>d</sup>       | n.d.                | 61.08 <sup>c</sup> | n.d.    |
| Marco Aurelio | n.d.        | 0.48 <sup>b</sup>             | 1.08 <sup>a</sup>  | n.d.         | 0.725 <sup>a</sup> | 0.43 <sup>d</sup>  | 59.845 <sup>b</sup> | 1.45 <sup>a</sup>  | 2.045 <sup>a</sup>      | n.d.                | 66.06 <sup>b</sup> | n.d.    |
| Nadif         | n.d.        | 0.23 <sup>d</sup>             | 0.59 <sup>d</sup>  | n.d.         | 0.25 <sup>c</sup>  | 1.94 <sup>a</sup>  | 56.11 <sup>c</sup>  | 1.12 <sup>c</sup>  | 1.23 <sup>e</sup>       | n.d.                | 61.47 <sup>c</sup> | n.d.    |
| Kronos        | n.d.        | 0.46 <sup>b</sup>             | 0.935 <sup>b</sup> | n.d.         | 0.3 <sup>bc</sup>  | 1.105 <sup>c</sup> | 52.8 <sup>e</sup>   | 1.37 <sup>b</sup>  | 1.735 <sup>b</sup>      | n.d.                | 58.71 <sup>d</sup> | n.d.    |

Results are expressed as  $\mu\text{g g}^{-1}$  of flour on a dry sample weight basis. Data are represented as mean  $\pm$  standard deviation of three replicate extractions. The same letter indicates no statistical difference, whereas different letters stand for significant statistical difference ( $P < 0.05$ ; Tukey's test).
